# Supplementary material for: Fibronectin on circulating extracellular vesicles as a liquid biopsy to detect breast cancer
Source: PubMed Central journal article supplement (PMC5130002; doi:10.18632/oncotarget.9561), 2016-05-23
Supplement: oncotarget-07-40189-s001.pdf [file oncotarget-07-40189-s001.pdf]

## Fibronectin on circulating extracellular vesicles as a liquid biopsy to detect breast cancer

### SUPPLEMENTARY FIGURES AND TABLES

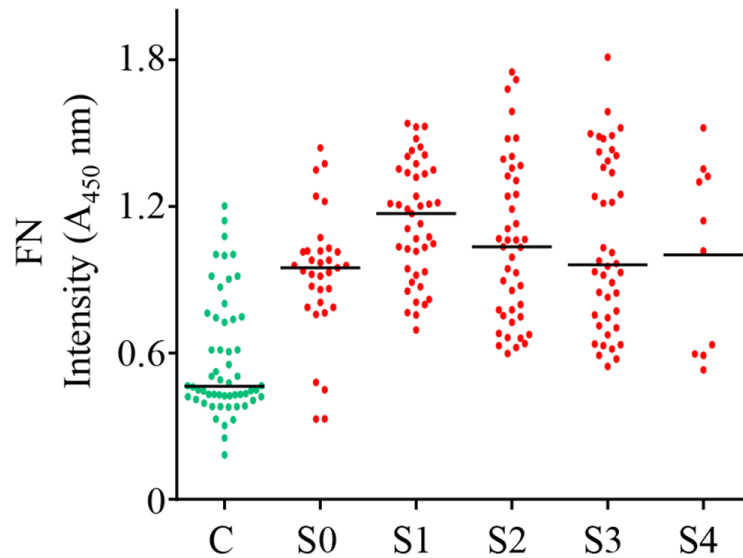

**Supplementary Figure S1: Fibronectin levels in plasma from health control and patients with each stage breast cancer in the test set using enzyme-linked immunosorbent assays.** Healthy controls (HC),  $n = 30$ ; stage 0 (S0),  $n = 33$ ; stage I (S1),  $n = 43$ ; stage II (S2),  $n = 43$ ; stage III (S3),  $n = 21$ ; stage IV (S4),  $n = 10$ . The black horizontal lines are means, and error bars are SEs.

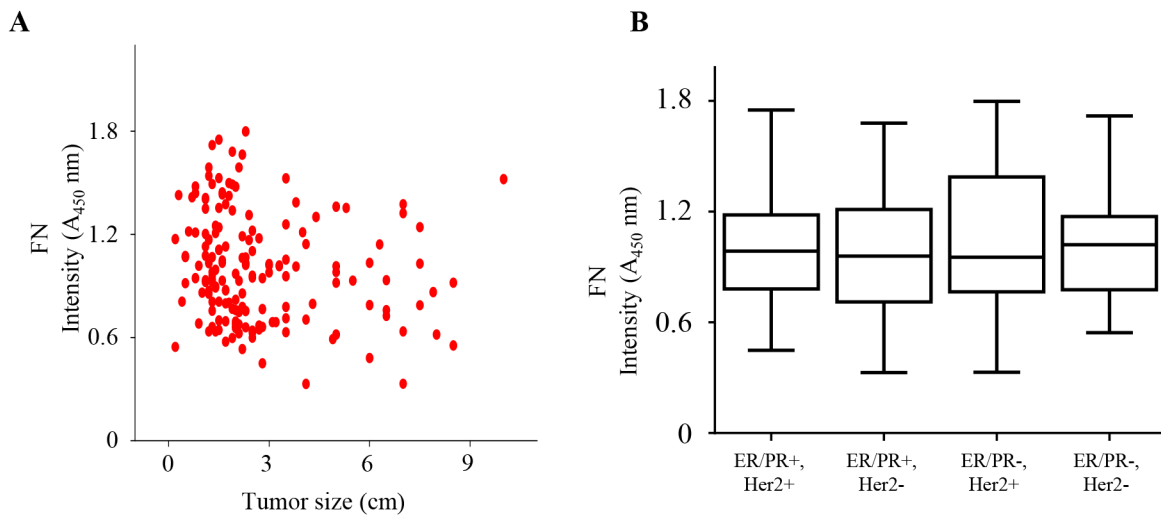

**Supplementary Figure S2:** **A.** The correlation between fibronectin (FN) levels and tumor size. There was no correlation between the levels of FN and tumor size. **B.** FN levels and four types of receptor status associated with breast cancer in test set. ER/PR+Her2+ (ER+/PR+Her2+, ER+/PR-Her2+, or ER-/PR+Her2+), n = 18; ER/PR+Her2- (ER+/PR+Her2-, ER-/PR+Her2-, or ER+/PR-Her2-), n = 111; ER/PR-Her2+ (ER-/PR-Her2+) n = 16; ER/PR-Her2- (ER-/PR-Her2-), n = 24. The black lines indicate the medians.

**Supplementary Table S1: List of proteins identified EVs derived from the breast cancer cell line MDA-MB-231. For each protein, they show IPI accession number, protein description, Mascot score, protein mass, and identified peptides.**

See Supplementary File 1

**Supplementary Table S2: List of proteins identified EVs derived from the breast cancer cell line MCF-7. For each protein, they show IPI accession number, protein description, Mascot score, protein mass, and identified peptides.**

See Supplementary File 2

**Supplementary Table S3: List of proteins identified both EVs from MDA-MB-231 and MCF-7. For each protein, they show IPI accession number and protein description.**

See Supplementary File 3
